# Supplementary material for: Iron Absorption in Celiac Disease and Nutraceutical Effect of 7-Hydroxymatairesinol. Mini-Review
Source: MDPI journal article supplement (doi:10.3390/molecules25092041), 2020-04-27
Supplement: s1 [file s1]

## Supplementary Materials

### 1. Materials and Methods

#### 1.1. Chemicals

7-HMR ((-)-Hydroxymatairesinol, mixture of epimers) was bought from Sigma-Aldrich. IL-6 was purchased from ReliaTech (Receptor Ligand Technologies GmbH).

#### 1.2. Cells Culture and treatment.

Caco-2 Cell line was purchased by IZSLER Brescia and was cultured in Dulbecco's Modified Eagle's Medium (DMEM) (Gibco) added with 10 % fetal calf serum (Gibco), flutamine 1mM (Lonza) and 100X penicillin (10000 U)/streptomycin 10mg/ml (Sigma). Cells were grown at 37°C in humidified air with 5% CO<sub>2</sub>.

Confluent Caco-2 were respectively treated with 50 ng/ml IL-6 or 50 ng/ml IL-6 plus 1 μM 7-HMR or only 1 μM 7-HMR. After 24h total, RNA was extracted with TriReagent Solution (Ambion). Genomic DNA was digested using DNaseI (Promega) and reverse-transcribed using Im-PromII Reverse Transcriptase (Promega) to obtain cDNA, as described in Zanella et al. 2008 [102]. HAMP mRNA was analysed by quantitative RT-PCR using Assay on Demand kits (Applied Biosystem) on an ABI PRISM 7000 (Applied Biosystem). Hypoxanthine phosphoribosyltransferase 1(HPRT1) mRNA was used to normalize HAMP expression by the relative quantification method ( $2^{-\Delta\Delta Ct}$ ) as previously described [72].

Caco-2 cells at 80%–90% of confluence were co-transfected with 1 μg HAMP promoter-LUC plasmid (pGL2-HAMP-Luciferase) kindly provided by Prof. Camaschella [105] and 100ng of Renilla luciferase plasmid (Promega) using Lipofectamine 2000 reagent (Thermo Fischer Scientific), as recommended by the manufacturer's instructions. After 24h, cells were treated respectively with 50 ng/ml IL-6, 50 ng/ml IL-6 plus 1 μM 7-HMR and with only 1 μM 7-HMR. After 24 hours, cells were harvested and lysates were analysed, using the Dual-Glo Luciferase Assay System (Promega), as recommended by manufacturer's instructions. The photon emissions of extracted cells were quantified using a luminometer (Centro LB 960, Berthold Technologies).

#### 1.3. Statistical Analysis

For each test, three independent experiments were performed. mRNA expression and luciferase activity were expressed as fold induction and relative RLU respectively. Statistical analysis was performed using two-way T-Student analysis of variance test.
